# Supplementary material
Source: PubMed Central journal article supplement (PMC7440760)
Supplement: IAI.00137-20-s0002.pdf [file IAI.00137-20-s0002.pdf]

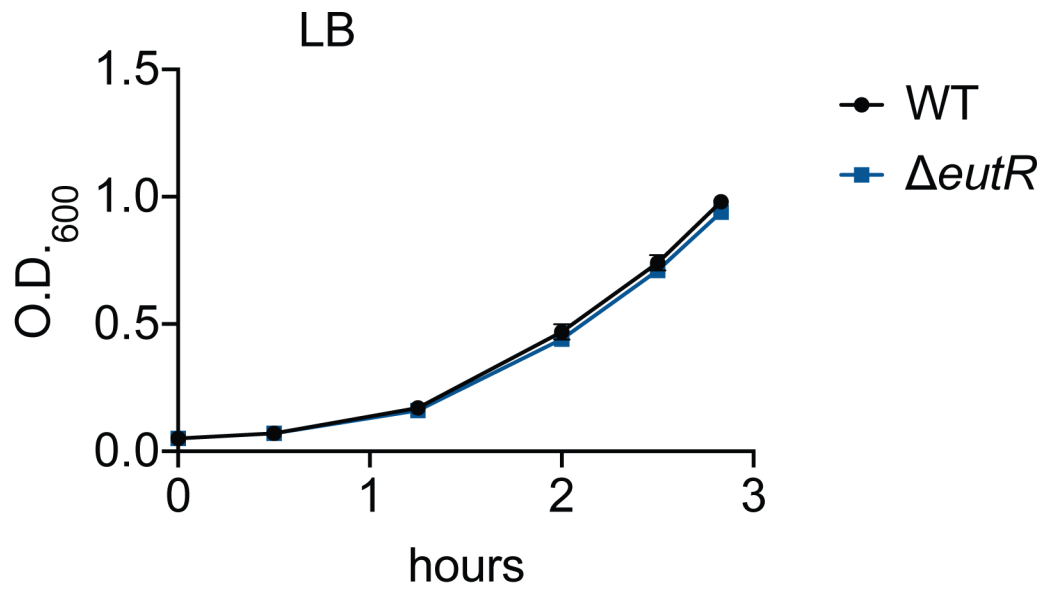

**Fig. S2.** Growth curves of WT and  $\Delta eutR$  *C. rodentium* grown in LB. n=3. Error bars represent the mean  $\pm$  SD.
