# Supplementary material
Source: PubMed Central journal article supplement (PMC7440760)
Supplement: IAI.00137-20-s0004.pdf [file IAI.00137-20-s0004.pdf]

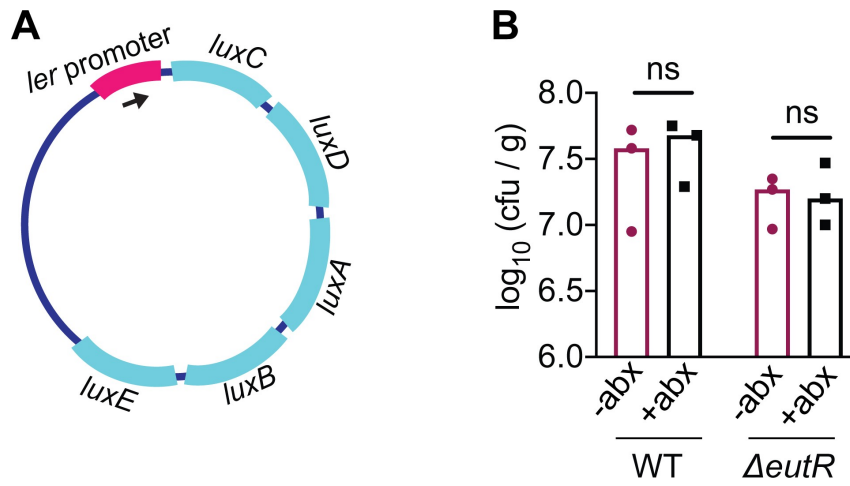

**Fig. S4.** A) Schematic of the *ler* bioluminescence expression system. B) CFU of WT and  $\Delta eutR$  *C. rodentium* transformed with the *ler::luxCDABE* expression plasmid recovered from stool at 10 dpi and plated on LB medium without or with antibiotics (abx).
