# Supplementary material
Source: PubMed Central journal article supplement (PMC7440760)
Supplement: IAI.00137-20-s0005.pdf [file IAI.00137-20-s0005.pdf]

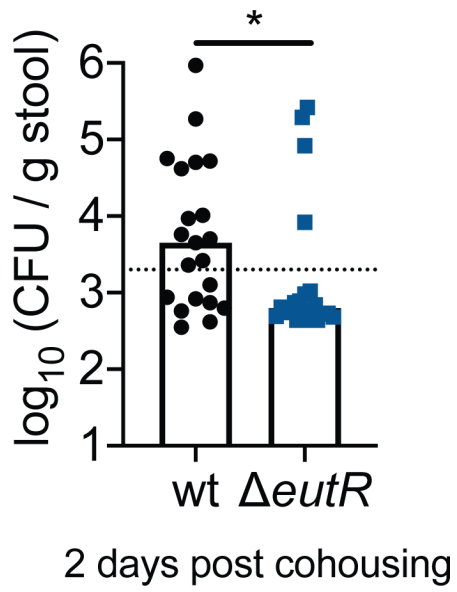

**Fig. S5.** CFU of WT and  $\Delta*eutR*$  *C. rodentium* shed in stool of recipient mice following cohousing with 10 dpi donor mice.
