# Supplementary material
Source: PubMed Central journal article supplement (PMC7440760)
Supplement: IAI.00137-20-s0007.pdf [file IAI.00137-20-s0007.pdf]

**Table S1. Primers used in this study.**

| Primer name       | Sequence                                                                      | Primer use         |
|-------------------|-------------------------------------------------------------------------------|--------------------|
| CR_LR_lacZ_F1     | TGCTCGTATGTTGTTTTAAATTGTGAGCGGATAACAATTTTTA<br>ACAGGtgtgtaggctggagctgctc      | Lambda red         |
| CR_LR_lacZ_R1     | GGTTTTATTATTTCTGGCCCCAGACGATCTGGTAGTGGTAG<br>CGTCCTGCATATGAATATCCTCCTTAG      | Lambda red         |
| CR_LR_eutR_F1     | ATCATGAAAAAGACCCGTACAGCCAATTTGCACCATCTTTAT<br>CATGAAGCATGTGTAGGCTGGAGCTGCTTC  | Lambda red         |
| CR_LR_eutR_R1     | GTATTTTCTCACATCCACTGGCGCATTCCGGTGATGCAGCGT<br>CGATGACGGCTCATATGAATATCCTCCTTAG | Lambda red         |
| pGEN_CR_eutR_F    | CTAGGAGCTCCTGTTGGCAAAGCTCGGCGA                                                | Cloning            |
| pGEN_CR_eutR_R    | CTAGGCTAGCTCACATCCACTGGCGCATTC                                                | Cloning            |
| EutRMBP_F1        | ATCCATGGGCATGAAAAAGACCCGTACA                                                  | Cloning            |
| EutRMBP_R1        | ATGGATCCTCACATCCACTGGCGCAT                                                    | Cloning            |
| EMSA_lerprom_F1   | GGCGAGCCGCTTACTCTAAA                                                          | EMSA               |
| EMSA_lerprom_R1   | ACCCCTATAAAAGCTATTAACCCCT                                                     | EMSA               |
| EMSA_regA_prom_F1 | TACAGAGGTAAGGGATAACTCATTG                                                     | EMSA               |
| EMSA_regA_prom_R1 | TGGGTTATCAGCTATGTAAACTCG                                                      | EMSA               |
| EMSA_blaprom_F1   | GGAATTCGAAAGGGCCTCGTG                                                         | EMSA               |
| EMSA_blaprom_R1   | CGGGATCCGGTGAGCAAAAAC                                                         | EMSA               |
| lerprom_RT_F      | GGCGAGCCGCTTACTCTAAA                                                          | ChIP-qPCR          |
| lerprom_RT_R      | ACCCCTATAAAAGCTATTAACCCCT                                                     | ChIP-qPCR          |
| eutSprom_RT_F     | GGTTCTCCCGCGCATTAAATAAT                                                       | ChIP-qPCR          |
| eutSprom_RT_R     | CGCCAGCGTGACCTGTTTA                                                           | ChIP-qPCR          |
| CR_rpoA_F         | AATCGCCTCTTCAGGATCGA                                                          | ChIP-qPCR, RT-qPCR |
| CR_rpoA_R         | CGTACCGACCTGGACAAGCT                                                          | ChIP-qPCR, RT-qPCR |
| CR_eutS_F         | CAGGAATTTGTGCCGGGTAA                                                          | RT-qPCR            |
| CR_eutS_R         | GCTTCGGGTACGCCGATT                                                            | RT-qPCR            |

|               |                                  |         |
|---------------|----------------------------------|---------|
| CR_espA_F     | AAGCGCCGGTGATTTGC                | RT-qPCR |
| HS_espA_R     | CGTTGTCAAATTATTCGCTTTAGC         | RT-qPCR |
| CR_ler_F      | ACAGTTTGAATCTCCTGCTCACGC         | RT-qPCR |
| CR_ler_R      | AATTCGCCCAACAACAAGCCCATAC        | RT-qPCR |
| CR_16S_F      | GGGAGGAAGGGATTGTGGTT             | RT-qPCR |
| CR_16S_R      | CGGGGATTTACATCCGACT              | RT-qPCR |
| CR_kfcC_F     | GGTGCGAATATCGCCAGTGT             | RT-qPCR |
| CR_kfcC_R     | GTGCCATCGGCTGTAGCAT              | RT-qPCR |
| plux_CR_ler_F | CTAGGTTTAAACGAAAAATGGCTGCGTTACGT | Cloning |
| plux_CR_ler_R | CTAGTACGTATGGGCGAATTAGTTTCCATAT  | Cloning |
