# Supplementary material
Source: PubMed Central journal article supplement (PMC7440760)

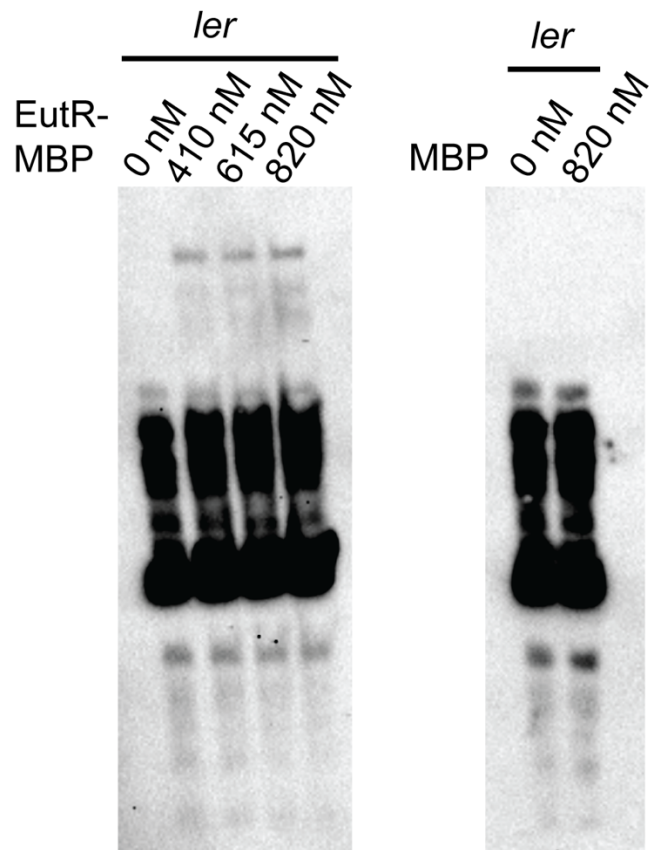

**Fig. S3.** EMSA of the *ler* promoter with EutR::MBP or MBP.

Supplement: IAI.00137-20-s0003.pdf [file IAI.00137-20-s0003.pdf]

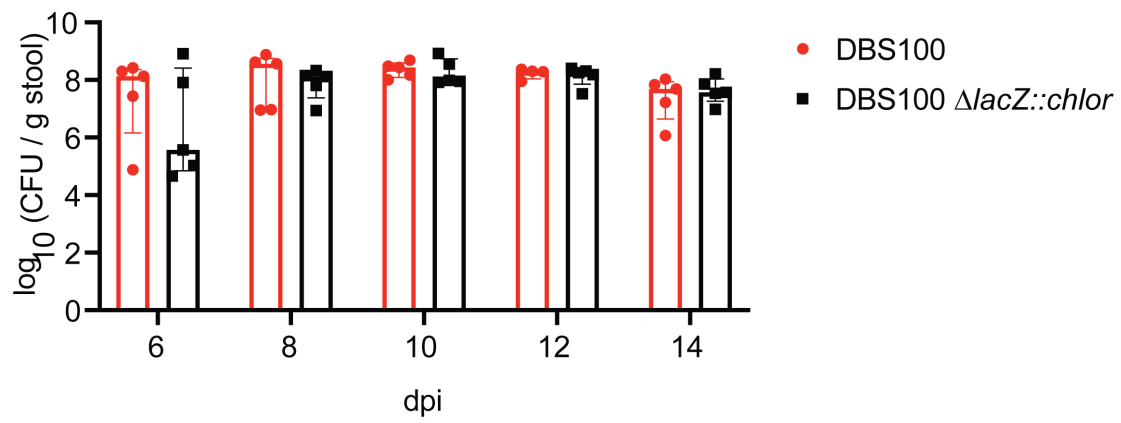

**Fig. S6.** CFU of *C. rodentium* DBS100 and *C. rodentium* DBS100  $\Delta$ lacZ::chlor shed in stool.

Supplement: IAI.00137-20-s0006.pdf [file IAI.00137-20-s0006.pdf]
